# Supplementary material for: Decay Resistance of Surface Carbonized Wood
Source: MDPI journal article supplement (doi:10.3390/ma15238410), 2022-11-25
Supplement: s1 [file s1]

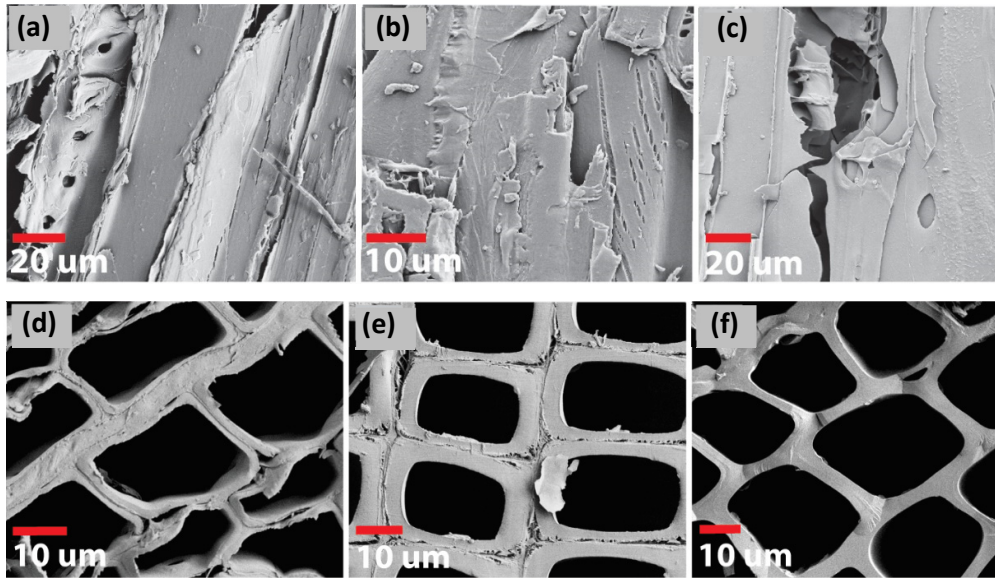

**Figure S1.** Undecayed reference surfaces (a–f) of spruce.

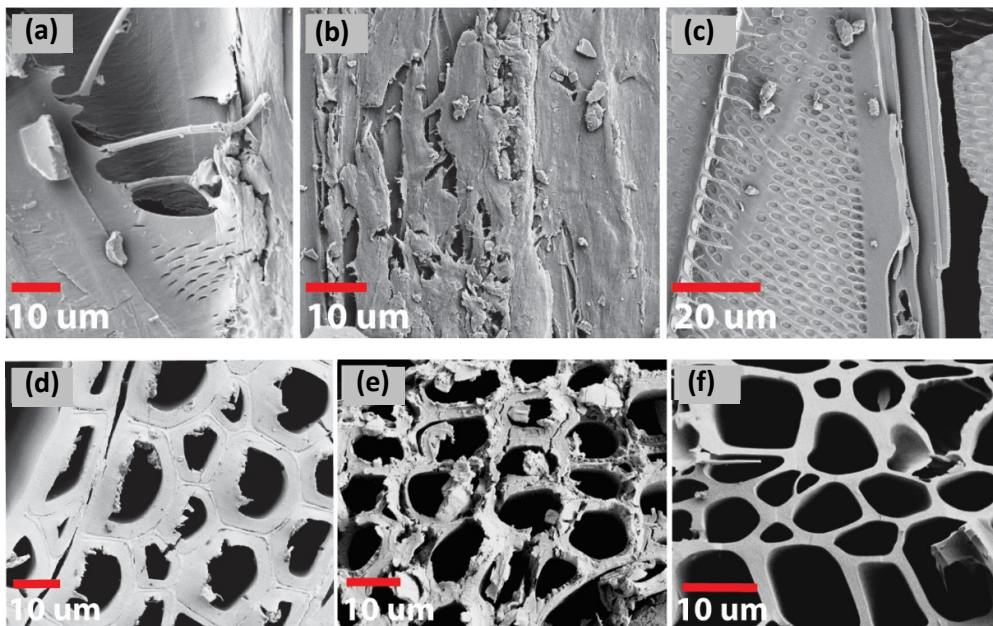

**Figure S2.** Undecayed reference surfaces (a–f) of birch.

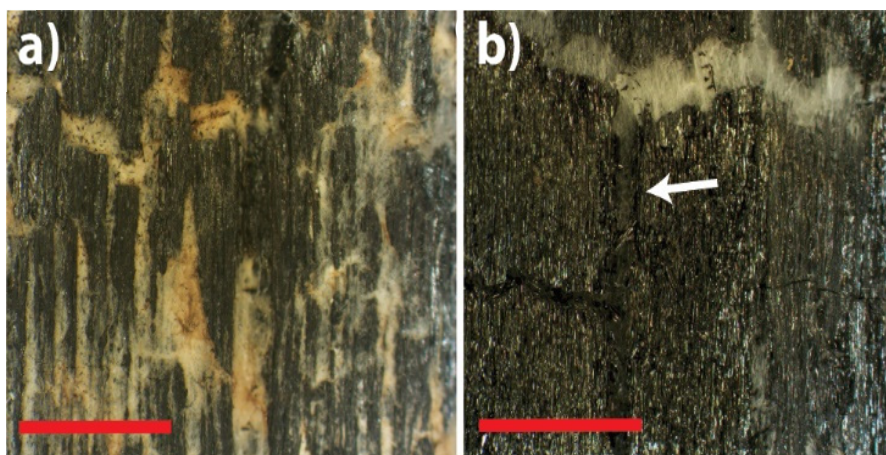

**Figure S3.** Images showing the fungal hyphae colonizing the modified surfaces of samples BF-CP (a) and SF-TV (b).

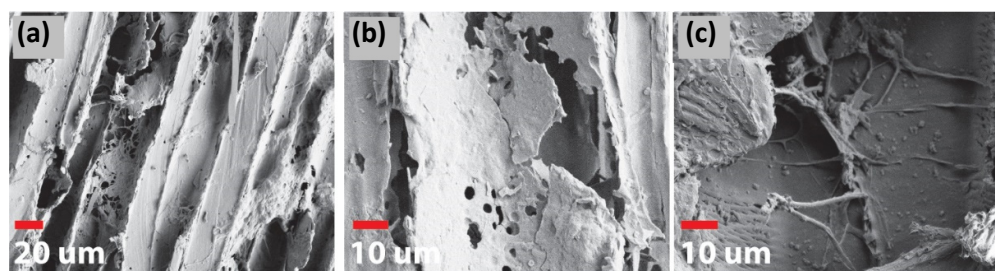

**Figure S4.** Reference sample surfaces (a–c).

**Table S1.** Composition data for reference and decayed samples.

| Sample<br>(Spruce) | Acid Soluble<br>Lignin, (%) | Klason<br>Lignin, % | Arabinose<br>(%) | Rhamnose<br>(%) | Galactose<br>(%) | Glucose (%) | Xylose (%) | Mannose (%) |
|--------------------|-----------------------------|---------------------|------------------|-----------------|------------------|-------------|------------|-------------|
| SR_0               | 0.49                        | 27.25               | 1.14             | 0.25            | 3.85             | 48.28       | 5.99       | 13.12       |
| SR-CP_0            | 1.92                        | 58.35               | 0.81             | 0.44            | 1.82             | 14.98       | 3.26       | 1.74        |
| SR-CP_2            | 1.59                        | 59.31               | 0.56             | 0.18            | 1.90             | 15.41       | 2.98       | 1.83        |
| SR-TV_0            | 1.80                        | 31.42               | 1.21             | 0.31            | 4.14             | 42.97       | 5.78       | 11.44       |
| SR-TV_2            | 1.22                        | 37.42               | 1.21             | 0.26            | 3.91             | 44.00       | 5.86       | 11.61       |
|                    |                             |                     |                  |                 |                  |             |            |             |
| SC_0               | 0.48                        | 60.96               | 0.04             | 0.00            | 0.05             | 37.25       | 0.32       | 1.12        |
| SC_2               | 0.64                        | 30.62               | 0.69             | 0.12            | 1.62             | 49.66       | 5.33       | 11.72       |
| SC-CP_0            | 0.78                        | 56.75               | 0.07             | 0.00            | 0.31             | 41.75       | 0.74       | 2.85        |
| SC-CP_2            | 0.98                        | 30.02               | 0.41             | 0.05            | 1.51             | 45.36       | 3.33       | 8.15        |
| SC-TV_0            | 0.75                        | 51.78               | 0.11             | 0.00            | 0.55             | 44.26       | 1.06       | 3.48        |
| SC-TV_2            | 1.11                        | 31.14               | 0.50             | 0.12            | 2.07             | 49.29       | 3.85       | 9.65        |
|                    |                             |                     |                  |                 |                  |             |            |             |
| SF_0               | 0.08                        | 91.90               | 0.00             | 0.01            | 0.01             | 7.30        | 0.01       | 0.01        |
| SF_2               | 0.47                        | 28.49               | 1.17             | 0.27            | 3.45             | 50.68       | 6.04       | 14.06       |
| SF-CP_0            | 1.01                        | 49.88               | 0.44             | 0.05            | 1.08             | 45.64       | 3.01       | 5.97        |
| SF-CP_2            | 1.66                        | 47.58               | 0.60             | 0.12            | 0.93             | 25.20       | 3.40       | 3.56        |
| SF-TV_0            | 1.75                        | 28.65               | 0.59             | 0.07            | 1.76             | 46.95       | 4.15       | 8.97        |
| SF-TV_2            | 1.07                        | 22.73               | 1.16             | 0.23            | 2.54             | 49.11       | 6.22       | 11.89       |

| Sample<br>(Birch) | Acid Soluble<br>Lignin, (%) | Klason<br>Lignin, % | Arabinose<br>(%) | Rhamnose<br>(%) | Galactose (%) | Glucose (%) | Xylose (%) | Mannose (%) |
|-------------------|-----------------------------|---------------------|------------------|-----------------|---------------|-------------|------------|-------------|
| BR_0              | 4.01                        | 17.76               | 0.53             | 0.60            | 0.93          | 48.36       | 28.76      | 0.99        |
| BR-CP_0           | 4.64                        | 36.13               | 0.21             | 0.36            | 0.39          | 29.75       | 17.45      | 0.84        |
| BR-CP_2           | 4.86                        | 34.96               | 0.24             | 0.37            | 0.38          | 32.21       | 18.39      | 0.92        |
| BR-TV_0           | 5.16                        | 25.42               | 0.43             | 0.47            | 0.81          | 36.37       | 19.05      | 1.89        |
| BR-TV_2           | 5.93                        | 28.20               | 0.57             | 0.58            | 0.99          | 34.88       | 21.09      | 1.41        |
|                   |                             |                     |                  |                 |               |             |            |             |
| BC_0              | 0.67                        | 49.43               | 0.00             | 0.00            | 0.00          | 49.26       | 1.57       | 0.31        |
| BC_2              | 3.26                        | 20.93               | 0.24             | 0.33            | 0.53          | 46.43       | 23.71      | 1.65        |
| BC-CP_0           | 1.06                        | 48.87               | 0.01             | 0.00            | 0.07          | 46.52       | 2.15       | 0.40        |
| BC-CP_2           | 2.16                        | 29.65               | 0.11             | 0.13            | 0.29          | 50.13       | 14.71      | 1.23        |
| BC-TV_0           | 1.21                        | 46.70               | 0.04             | 0.02            | 0.15          | 52.68       | 5.22       | 0.60        |

|         |      |       |      |      |      |       |       |      |
|---------|------|-------|------|------|------|-------|-------|------|
| BC-TV_2 | 2.64 | 29.22 | 0.14 | 0.20 | 0.36 | 55.40 | 18.67 | 1.56 |
|         |      |       |      |      |      |       |       |      |
| BF_0    | 0.09 | 95.99 | 0.01 | 0.01 | 0.01 | 4.45  | 0.02  | 0.01 |
| BF_2    | 3.95 | 18.32 | 0.51 | 0.63 | 1.06 | 48.72 | 28.01 | 0.82 |
| BF-CP_0 | 1.83 | 53.26 | 0.11 | 0.06 | 0.25 | 43.74 | 6.49  | 0.65 |
| BF-CP_2 | 4.71 | 43.62 | 0.23 | 0.33 | 0.43 | 25.08 | 12.99 | 0.31 |
| BF-TV_0 | 2.35 | 42.72 | 0.16 | 0.21 | 0.49 | 44.24 | 10.50 | 0.69 |
| BF-TV_2 | 5.02 | 23.84 | 0.66 | 0.56 | 1.07 | 37.57 | 24.15 | 0.70 |
